# Supplementary material
Source: PubMed Central journal article supplement (PMC5434706)

Supplementary Figure S1

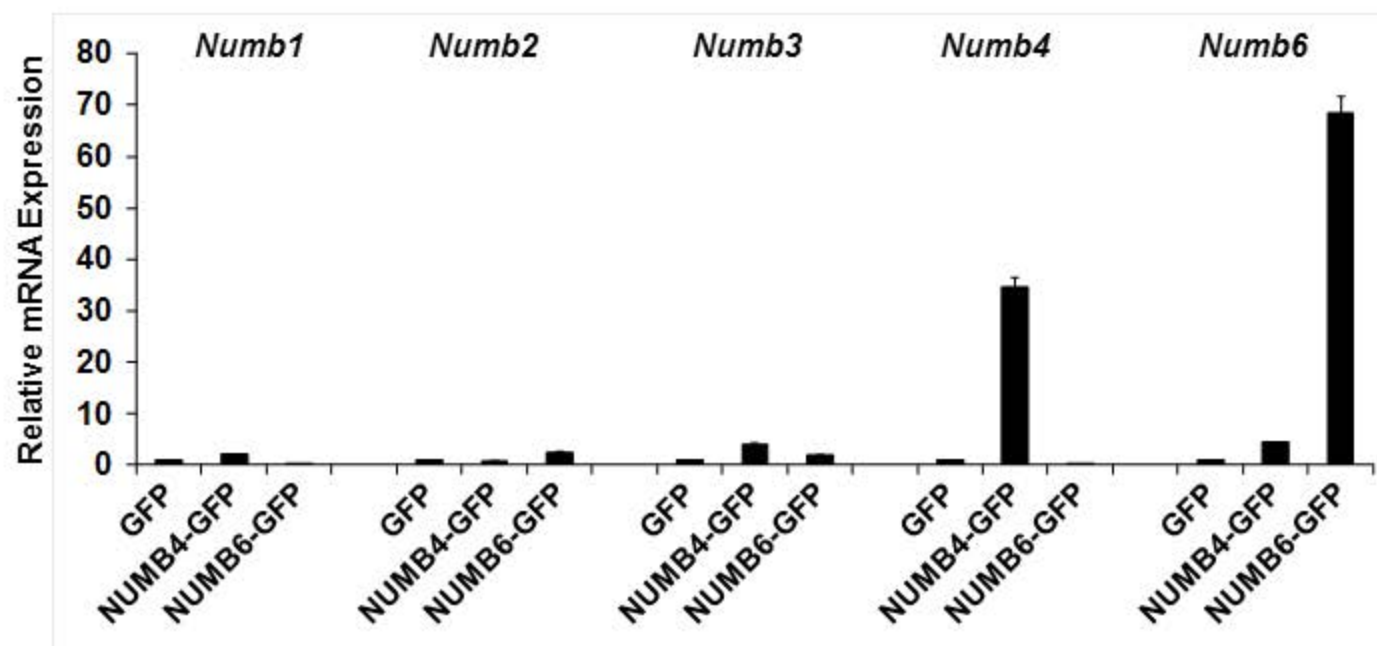

## Supplementary Figure S2

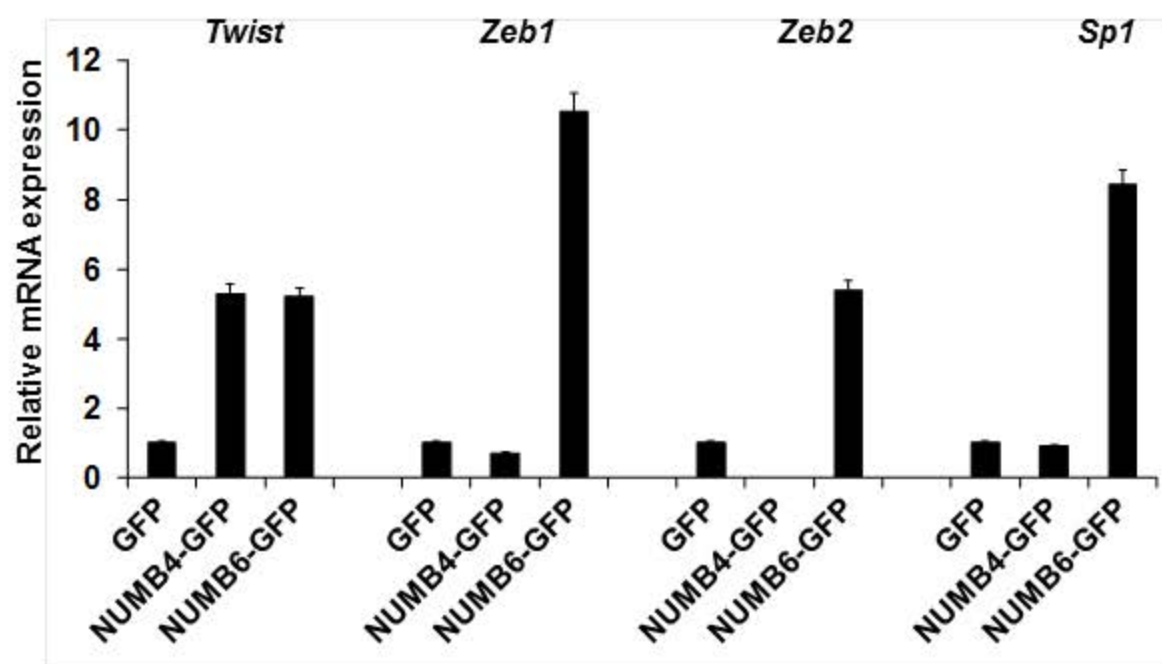

### Supplementary Figure S3

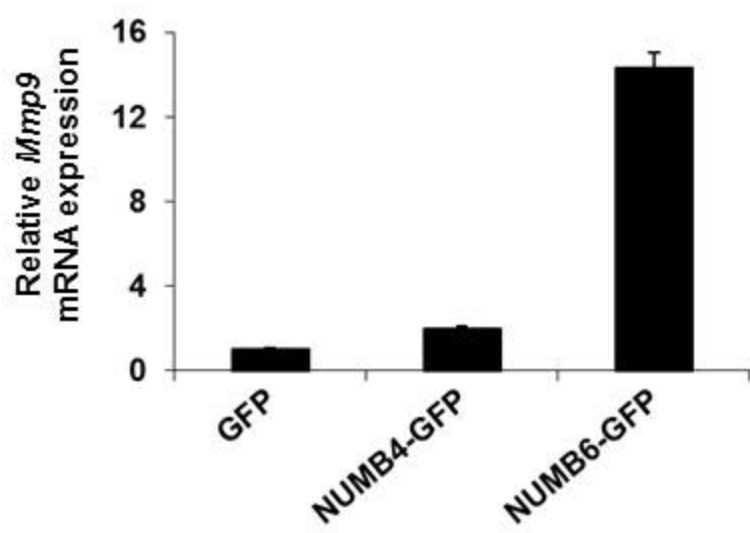

# Supplementary Figure S4

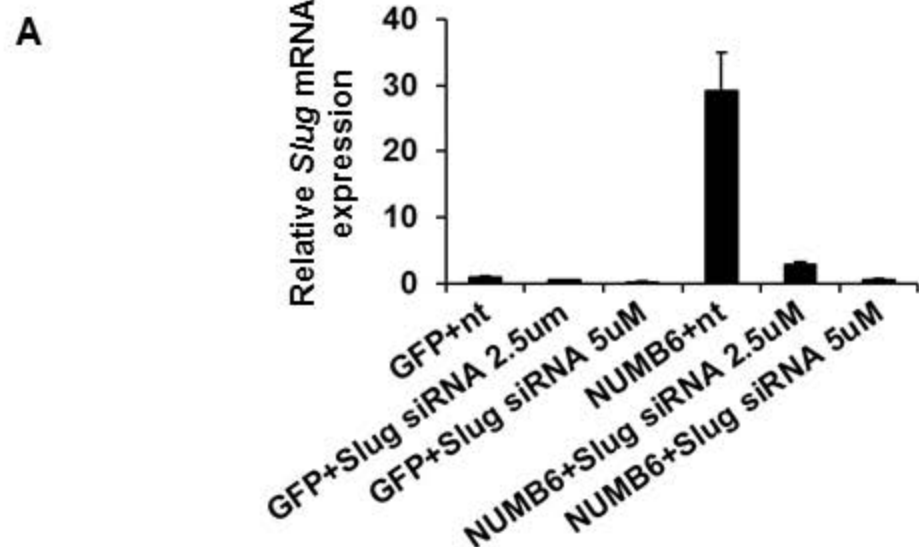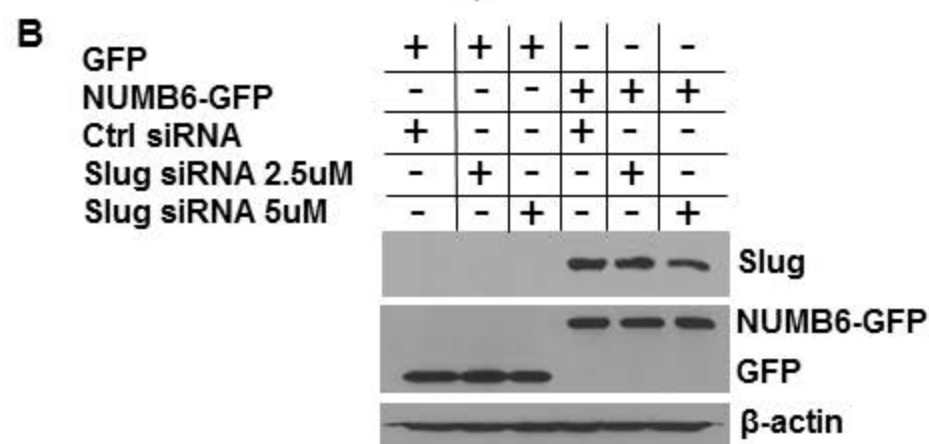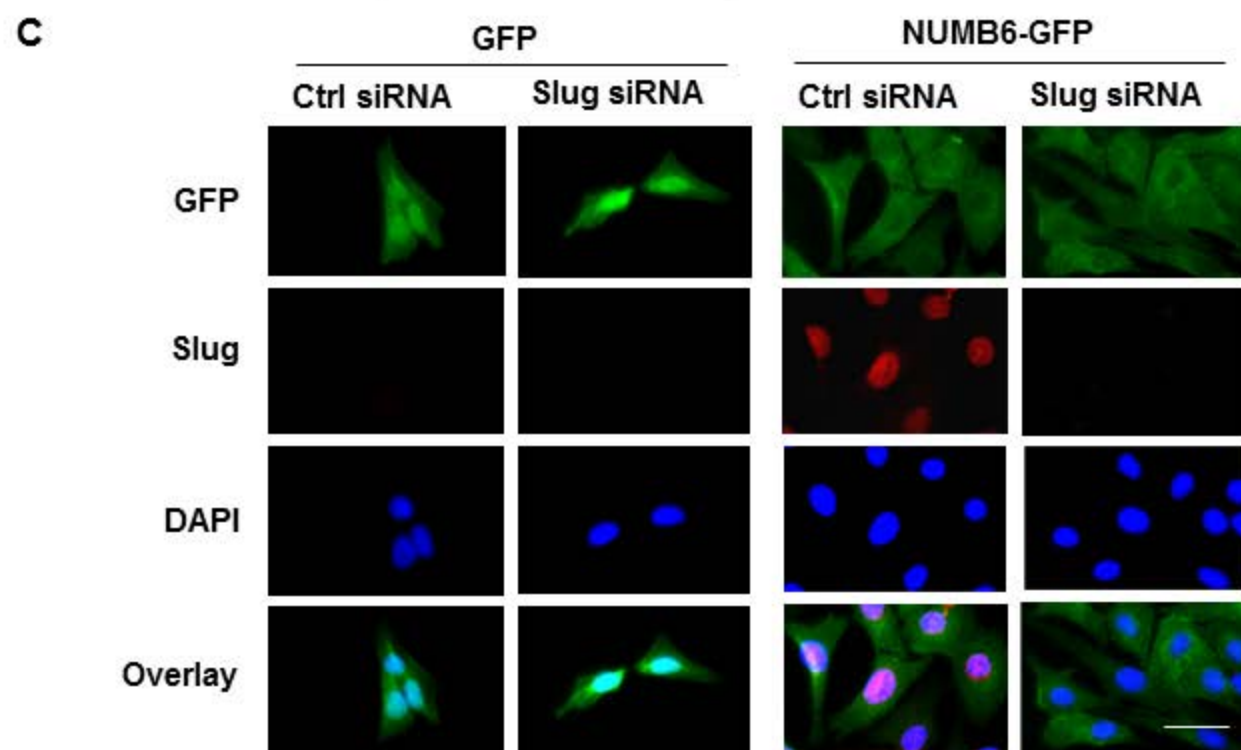

Supplementary Figure S5

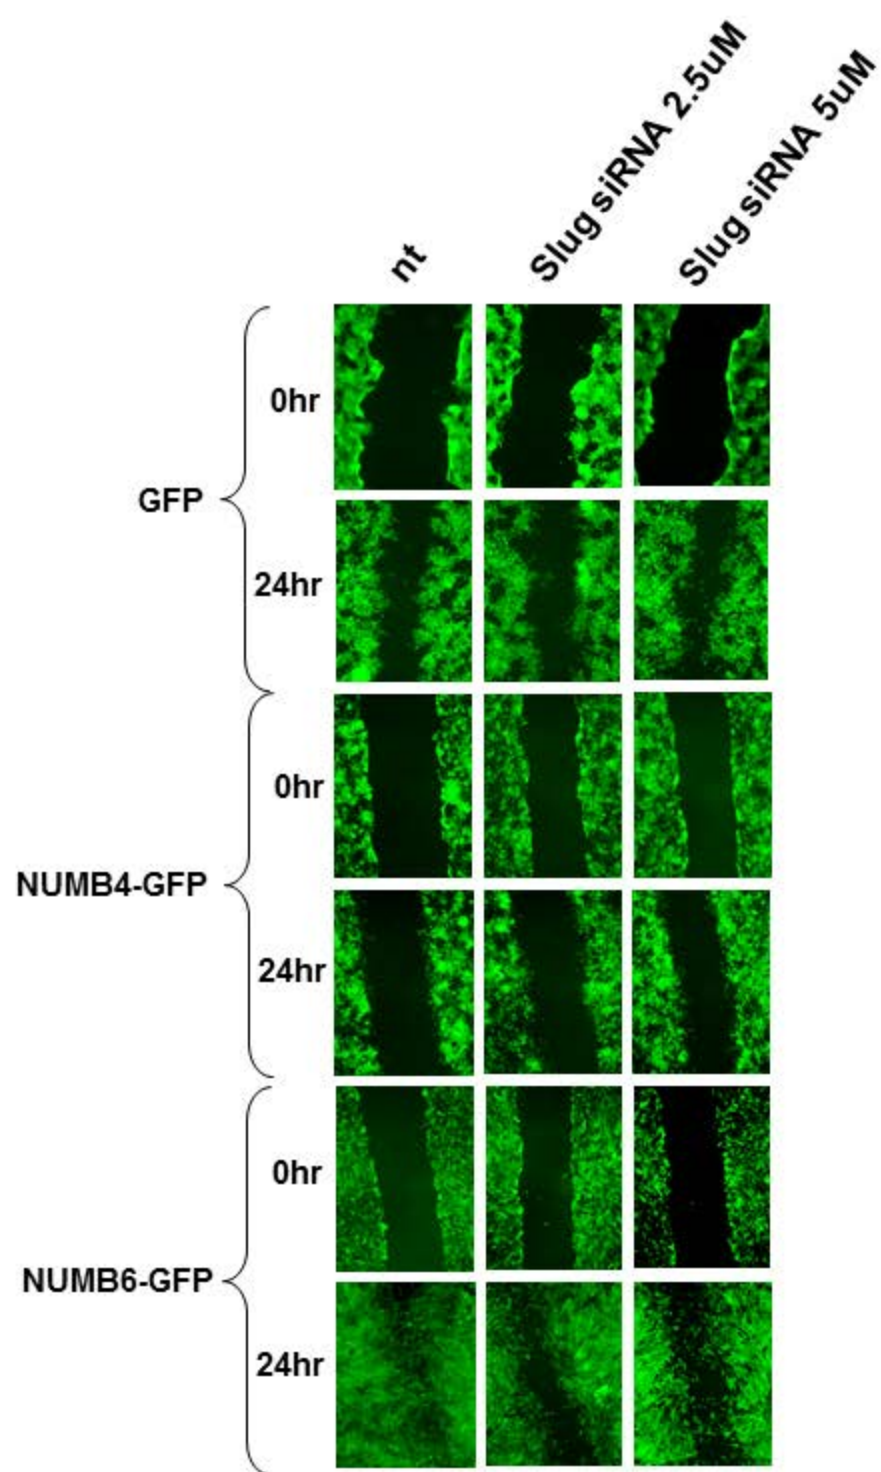

# Supplementary Figure S6

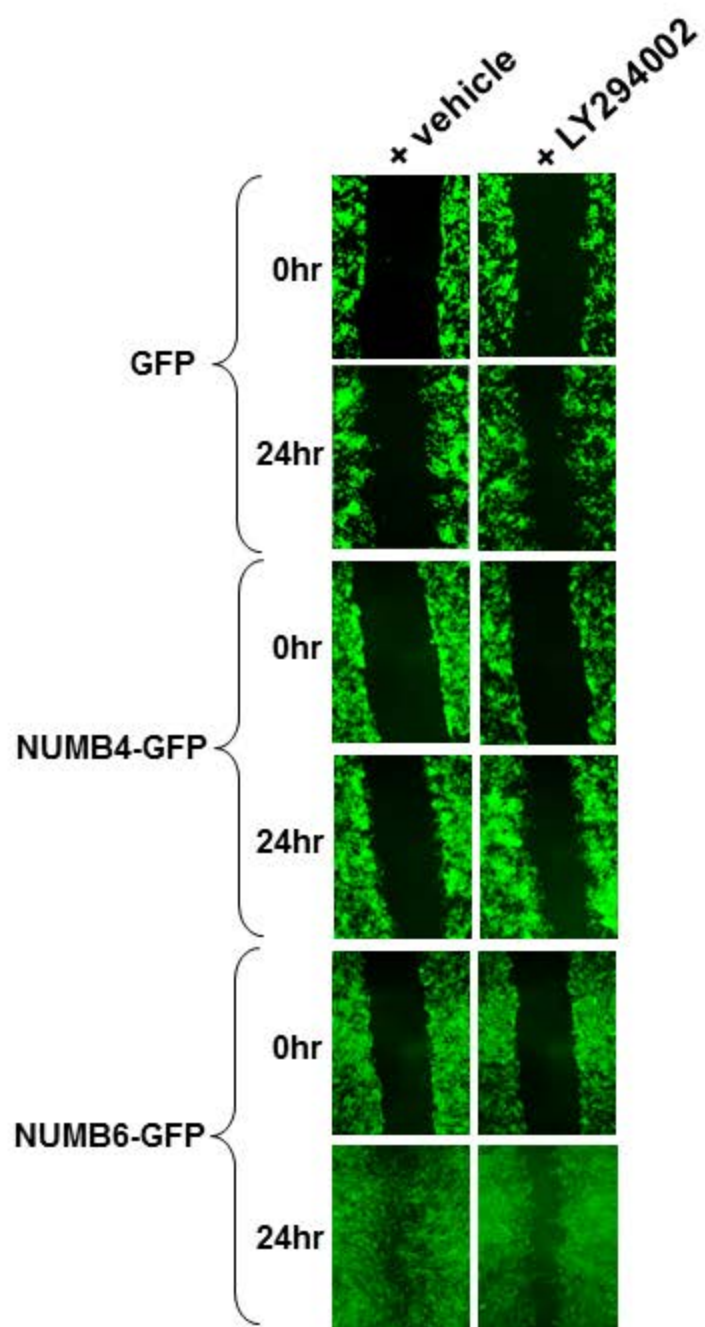

Supplement: NIHMS861675-supplement-Supp_Fig_S1-6.pdf [file NIHMS861675-supplement-Supp_Fig_S1-6.pdf]
